# Supplementary material for: Serving Temperatures of Best-Selling Coffees in Two Segments of the Brazilian Food Service Industry Are “Very Hot”
Source: MDPI journal article supplement (doi:10.3390/foods9081047), 2020-08-03
Supplement: s1 [file s1]

## SUPPLEMENTARY MATERIAL

**Table S1** Estimates of per capita (15+) daily intakes of coffee (in ml of beverage) in Brazil compared to selected countries and world regions, 2015 and 2019.

| Country or World Region    | Population (15+) <sup>1</sup> |                   | Consumption of green coffee by country or world region in kg <sup>3</sup> |               | Consumption of green coffee in kg/person/year <sup>4</sup> |       | Consumption of roasted coffee in kg/person/year <sup>5</sup> |       | Annual intake of coffee in ml/person <sup>6</sup> |         | Daily intake of coffee in ml/person <sup>7</sup> |      |
|----------------------------|-------------------------------|-------------------|---------------------------------------------------------------------------|---------------|------------------------------------------------------------|-------|--------------------------------------------------------------|-------|---------------------------------------------------|---------|--------------------------------------------------|------|
|                            | 2015                          | 2019 <sup>2</sup> | 2015                                                                      | 2019          | 2015                                                       | 2019  | 2015                                                         | 2019  | 2015                                              | 2019    | 2015                                             | 2019 |
| Brazil                     | 158,627,509                   | 168,540,057       | 1,230,480,000                                                             | 1,325,340,000 | 7.76                                                       | 7.86  | 6.52                                                         | 6.61  | 81,482                                            | 82,601  | 223                                              | 226  |
| World                      | 5,448,471,219                 | 5,811,150,103     | 9,329,460,000                                                             | 9,869,220,000 | 1.71                                                       | 1.70  | 1.44                                                         | 1.43  | 17,986                                            | 17,840  | 49                                               | 49   |
| Europe                     | 625,629,041                   | 627,565,932       | 3,128,820,000                                                             | 3,336,900,000 | 5.00                                                       | 5.32  | 4.20                                                         | 4.47  | 52,532                                            | 55,853  | 144                                              | 153  |
| Africa                     | 695,955,074                   | 799,767,716       | 657,060,000                                                               | 588,000,000   | 0.94                                                       | 0.74  | 0.79                                                         | 0.62  | 9,917                                             | 7,723   | 27                                               | 21   |
| Asia & Oceania             | 3,373,371,984                 | 3,584,022,598     | 1,971,780,000                                                             | 2,116,560,000 | 0.58                                                       | 0.59  | 0.49                                                         | 0.50  | 6,140                                             | 6,203   | 17                                               | 17   |
| Central America and Mexico | 120,275,359                   | 131,357,633       | 317,700,000                                                               | 317,640,000   | 2.64                                                       | 2.42  | 2.22                                                         | 2.03  | 27,746                                            | 25,401  | 76                                               | 70   |
| North America              | 289,562,407                   | 302,083,790       | 1,736,040,000                                                             | 1,894,680,000 | 6.00                                                       | 6.27  | 5.04                                                         | 5.27  | 62,977                                            | 65,883  | 173                                              | 181  |
| South America              | 311,754,735                   | 333,241,715       | 1,517,940,000                                                             | 1,615,440,000 | 4.87                                                       | 4.85  | 4.09                                                         | 4.07  | 51,145                                            | 50,921  | 140                                              | 140  |
| USA                        | 259,193,542                   | 270,191,676       | 1,520,160,000                                                             | 1,663,920,000 | 5.86                                                       | 6.16  | 4.93                                                         | 5.18  | 61,607                                            | 64,688  | 169                                              | 177  |
| Argentina                  | 32,215,601                    | 34,152,047        | 32,760,000                                                                | 34,440,000    | 1.02                                                       | 1.01  | 0.85                                                         | 0.85  | 10,682                                            | 10,593  | 29                                               | 29   |
| Colombia                   | 35,864,007                    | 39,595,244        | 104,160,000                                                               | 106,500,000   | 2.90                                                       | 2.69  | 2.44                                                         | 2.26  | 30,507                                            | 28,253  | 84                                               | 77   |
| Japan                      | 111,360,657                   | 110,731,963       | 467,400,000                                                               | 451,380,000   | 4.20                                                       | 4.08  | 3.53                                                         | 3.43  | 44,088                                            | 42,819  | 121                                              | 117  |
| Switzerland                | 7,360,004                     | 7,069,406         | 64,140,000                                                                | 64,440,000    | 8.71                                                       | 9.12  | 7.32                                                         | 7.66  | 91,541                                            | 95,749  | 251                                              | 262  |
| Norway                     | 4,265,817                     | 4,485,693         | 46,440,000                                                                | 54,240,000    | 10.89                                                      | 12.09 | 9.15                                                         | 10.16 | 114,354                                           | 127,014 | 313                                              | 348  |

<sup>1</sup> Populations aged 15 years and older (15+) for selected countries and world regions were obtained from the Population Division (by age group) of the United Nations [8]. <sup>2</sup> Once the populations by age groups from the UN are available at 5 years intervals only (e.g. 2005, 2010, 2015 and 2020), the 15+ populations in 2019 corresponds to UN estimates of the 15+ population in 2020. <sup>3</sup> Coffee consumption data by country or world region was obtained from the International Coffee Organization (ICO) [7] and it was assumed all ICO weight data is in green coffee form. <sup>4</sup> Consumption of green coffee (in kg/person/year) was obtained by dividing the consumption of green coffee in kg by the population (15+) of country or world region. <sup>5</sup> Consumption of roasted coffee (in kg/person/year) was obtained by applying a 1.19 conversion factor to roasted coffee (1.19 kg green coffee = 1.0 kg of roasted coffee), according to ICO [9]. <sup>6</sup> Annual intake of coffee (in ml/person) was obtained by applying a coffee-to-water ratio of 1 to 12.5 (8 g roasted coffee/100 ml water) [10, 11] to the consumption of roasted coffee (in kg/person/year) × 1,000. <sup>7</sup> Daily intakes of coffee (in ml/person) were obtained by dividing the annual intake of coffee (in ml/person) by 365.
